# Supplementary material for: Comparison between Self-Completed and Interviewer-Administered 24-Hour Dietary Recalls in Cancer Survivors: Sampling Bias and Differential Reporting
Source: MDPI journal article supplement (doi:10.3390/nu14245236), 2022-12-08
Supplement: s1 [file s1]

**Title:** Comparison between Self-Completed and Interviewer-Administered 24-Hour Dietary  
Recalls in Cancer Survivors: Sampling Bias and Differential Reporting

**Corresponding author:** Rana E Conway

Online Supplementary material

**Supplementary Table S1.** Logistic regression analyses for method of completing 24-HR (interviewer-completed 24-HR as target group)

| Demographic and health characteristics, and use of technology | n    | Unadjusted |            |                | Adjusted <sup>a</sup> (n1019) |            |                |
|---------------------------------------------------------------|------|------------|------------|----------------|-------------------------------|------------|----------------|
|                                                               |      | OR         | 95% CI     | P              | OR                            | 95% CI     | P              |
| Age (years)                                                   | 1221 | 1.08       | 1.07-1.10  | < <b>0.001</b> | 1.09                          | 1.07-1.11  | < <b>0.001</b> |
| Gender                                                        | 1224 |            |            |                |                               |            |                |
| Male                                                          |      | 1.00       | -          | -              | 1.00                          | -          | -              |
| Female                                                        |      | 0.65       | 0.51-0.83  | < <b>0.001</b> | 1.26                          | 0.90-1.76  | 0.174          |
| Ethnicity                                                     | 1219 |            |            |                |                               |            |                |
| White                                                         |      | 1.00       | -          | -              | 1.00                          | -          | -              |
| Non-White                                                     |      | 1.40       | 0.89-2.20  | 0.149          | 2.67                          | 1.44-4.94  | <b>0.002</b>   |
| Highest Level of Education                                    | 1145 |            |            |                |                               |            |                |
| Degree or higher                                              |      | 1.00       | -          | -              | 1.00                          | -          | -              |
| A-levels                                                      |      | 1.6        | 1.03-2.38  | <b>0.036</b>   | 2.11                          | 1.29-3.44  | <b>0.003</b>   |
| GCSE/Vocational                                               |      | 1.8        | 1.33-2.55  | < <b>0.001</b> | 2.36                          | 1.60-3.46  | < <b>0.001</b> |
| No formal qualifications                                      |      | 6.9        | 4.74-10.02 | < <b>0.001</b> | 5.13                          | 3.31-7.96  | < <b>0.001</b> |
| Marital status                                                | 1223 |            |            |                |                               |            |                |
| Married                                                       |      | 1.00       | -          | -              | 1.00                          | -          | -              |
| Divorced/Separated/Widowed                                    |      | 1.92       | 1.44-2.56  | < <b>0.001</b> | 2.69                          | 0.91-2.08  | 0.137          |
| Single                                                        |      | 1.02       | 0.66-1.58  | 0.945          | 1.37                          | 0.91-3.00  | 0.101          |
| Employment                                                    | 1217 |            |            |                |                               |            |                |
| Employed                                                      |      | 1.00       | -          | -              | 1.00                          | -          | -              |
| Retired                                                       |      | 2.91       | 2.21-3.83  | < <b>0.001</b> | 0.94                          | 0.62-1.41  | 0.771          |
| Other                                                         |      | 1.74       | 1.09-2.81  | <b>0.021</b>   | 0.338                         | 0.73-2.42  | 0.338          |
| IMD (decile)                                                  | 1161 | 0.96       | 0.91-1.00  | 0.064          | 0.957                         | 0.898-1.02 | 0.179          |
| BMI                                                           | 1160 |            |            |                |                               |            |                |
| Underweight/healthy weight                                    |      | 1.00       | -          | -              | 1.00                          | -          | -              |
| Overweight                                                    |      | 0.95       | 0.82-1.25  | 0.710          | 0.73                          | 0.52-1.03  | 0.072          |
| Obesity                                                       |      | 1.24       | 0.89-1.74  | 0.199          | 1.01                          | 0.67-1.51  | 0.969          |

Abbreviations: CI, confidence interval; OR, odds ratio

<sup>a</sup>adjusted for Age, Gender, Ethnicity, Highest level of Education, Marital status, Employment status, IMD, BMI category
